# Supplementary material for: N-terminal PEGylated cellulase: a high stability enzyme in 1-butyl-3-methylimidazolium chloride
Source: Royal Society of Chemistry journal article supplement (doi:10.1039/c3gc40104a), 2013-01-01
Supplement: c3gc40104a.pdf [file c3gc40104a.pdf]

## Supporting Information

### N-terminal PEGylated Cellulase: A High Stability Enzyme in 1-butyl-3-methylimidazolium chloride

Lu Li, Juan Xie, Shitao Yu,\* Zhongliang Su, Shiwei Liu, Fusheng Liu, Congxia Xie, Baoquan Zhang and Chenggang Zhang

College of Chemical Engineering, Qingdao University of Science and Technology, Qingdao,  
266042 (PR China)

#### Preparation of Cell-ALD

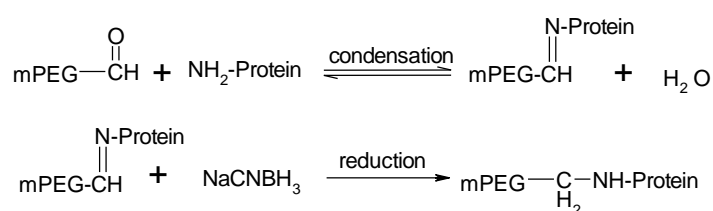

**Scheme S1** Reaction of cellulase modification with mPEG-ALD

#### Preparation of Cell-SPA 5k

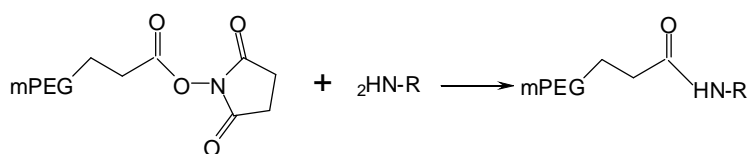

**Scheme S2** Reaction of cellulase modification with mPEG-SPA

#### Determination of conversion of cellulose

The conversion of cellulose was defined as follows:

$$\text{Conversion of cellulose(\%)} = \frac{\text{Concentration of reducing sugars mg/mL}}{\text{Concentration of cellulose mg/mL}} \times 100\% \times 0.9$$

#### Hydrolysis of MCC by Cell-ALD 5k and Cellulase in aqueous buffer system

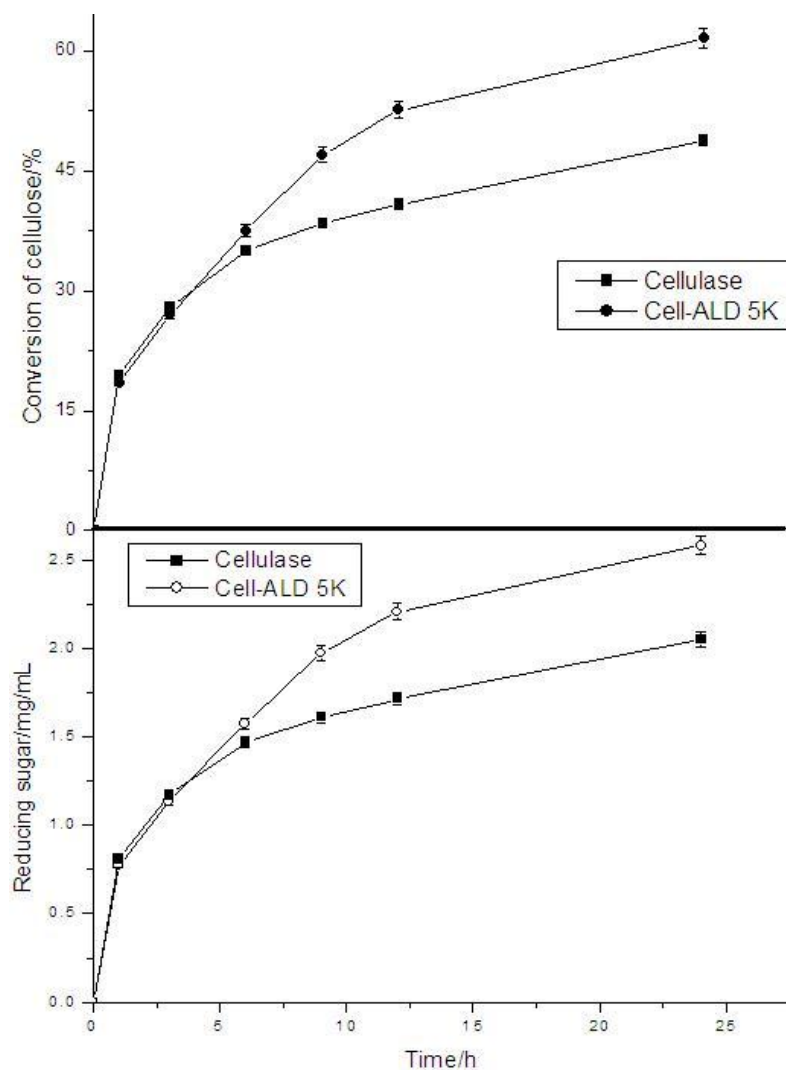

**Fig.S1** Hydrolysis of MCC by Cell-ALD 5k and Cellulase in aqueous buffer system

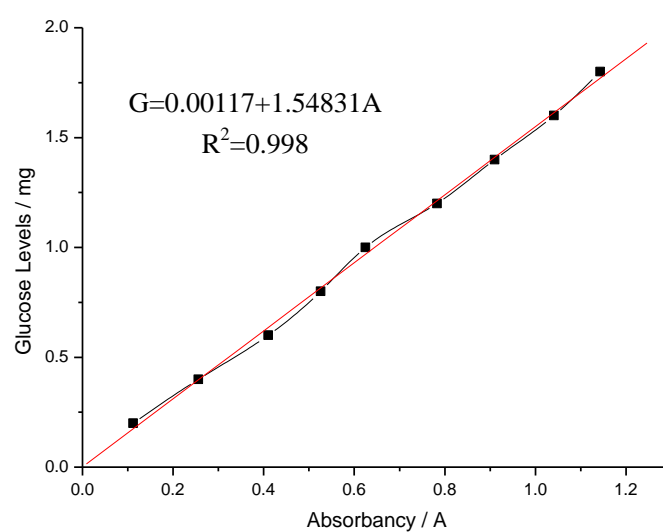

**Fig. S2** The absorbance at 540 nm of D-glucose standard solutions in DNS analysis.
